# Supplementary material for: Multi-organ point-of-care ultrasound for COVID-19 (PoCUS4COVID): international expert consensus
Source: Springer Nature journal article supplement (doi:10.1186/s13054-020-03369-5), 2020-12-01
Supplement: MOESM3 [file 18710766]

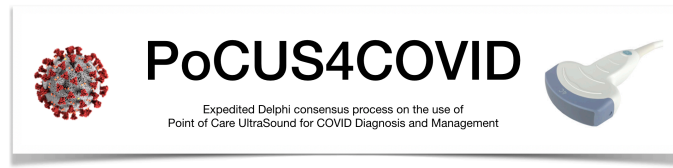

## PICO ELEMENTS

### 1. POPULATIONS

- a. MILDLY-ILL COVID-19 PATIENTS
- b. COVID-19 PATIENTS with RESP FAILURE
- c. COVID-19 PATIENTS with SEVERE EXTRA-PULM SIGNS & SYMPTOMS

### 2. INTERVENTIONS

- a. LUS ALONE
- b. MULTI-ORGAN POCUS

### 3. COMPARATORS

- a. NO LUNG IMAGING
- b. CXR
- c. CT LUNG

### 4. OUTCOMES

- a. MORE EFFECTIVE DX SARS-COV2 INFECTION
- b. MORE EFFECTIVE TRIAGE/DISPOSITION
- c. MORE ACCURATE PULMONARY DX
- d. MORE ACCURATE CVS DX
- e. MORE ACCURATE VTE DX
- f. MORE EFFECTIVE USE OF MECH VENT
- g. MORE APPROPRIATE FLUID MANAGEMENT
- h. MORE EFFECTIVE MONITORING
- i. BETTER INFECTION CONTROL

*Each PICO statement requires you to express your agreement with it based on a Likert scale (0-9): 0-3 = disagreement, 4-6 = uncertainty, 7-9 agreement.*

*The wording of the PICO questions during the 2 rounds of the this streamlined Delphi Technique was not changed substantially.*



## 1. POPULATIONS

- a. **MILDLY-ILL COVID-19 PATIENTS\*** - presenting to Emergency Department with fever, myalgia, cough, sore throat or other mild symptoms, including exertional dyspnea but not clinically evident acute respiratory failure/hypoxemia, shock, or any other life-threatening or potentially life-threatening condition)
- b. **COVID-19\* PATIENTS\* with RESPIRATORY FAILURE** - including both “Silent Hypoxia” & clinically-overt respiratory failure, either at presentation or along disease course
- c. **COVID-19\* PATIENTS \*with SEVERE EXTRA-PULMONARY SIGNS & SYMPTOMS** - such as shock, altered level of consciousness, stroke, suspected acute thromboembolic disease, acute kidney failure, acute peripheral ischemic disease, either at presentation or along disease course

\* **COVID-19 patients** refers to patients to be screened for SARS-CoV2 infection at first encounter, or already diagnosed with SARS-CoV2 infection . This is where the PICO Outcomes choices apply: e.g. with the Outcome “More effective diagnosis” and “More effective triage/Disposition” (Outcomes a, b) “COVID-19 PATIENTS” refers to patient at first encounter. However, “More effective monitoring” and all the others Outcomes (Outcomes c-i.), may apply either to first-encounter/unknown SARS-CoV2 infection, or already microbiologically demonstrated SARS-CoV2 infection).

## 2. INTERVENTIONS

- a. **LUS ALONE** – Clinically-integrated lung ultrasound and no other PoCUS applications
- b. **MULTI-ORGAN PoCUS** - Clinically-integrated multi-modal, multi-system point-of-care ultrasound, including:
  - Lung Ultrasound
  - Focused Cardiac Ultrasound (+/- hemodynamic measurements)
  - Abdominal scanning of great vessels and kidneys, bladder, gallbladder, liver (potentially including Doppler sampling of kidney artery/vein, Hepatic veins and Portal vein for diagnosis of systemic venous congestion), FAST exam
  - Extremity Duplex compression evaluation for DVT



### 3. COMPARATORS

- a. **NO LUNG IMAGING** – Standard/Institutional diagnostic/monitoring clinical workup without the use of any imaging modalities
- b. **CXR** – Standard/Institutional diagnostic/monitoring clinical workup including Chest X-Ray
- c. **CT LUNG** - Standard/Institutional diagnostic/monitoring clinical workup including Chest CT-Scan, plus angio-CT scan if indicated (thoracic great vessels, PE)

### 4. OUTCOMES

- a. **MORE EFFECTIVE DIAGNOSIS OF SARS-COV2 INFECTION**
  - Higher sensitivity, specificity, & accuracy in diagnosing SARS-CoV2 infection
- b. **MORE EFFECTIVE TRIAGE/DISPOSITION** – May include:
  - Higher accuracy at assessment of potential SARS-CoV2 disease
  - Higher accuracy in severity assessment of COVID-19 patients
  - Potentially resulting in more rapid provision and more appropriate level of care and cohorting of patients
- c. **MORE ACCURATE PULMONARY DIAGNOSIS** – May include:
  - Better assessment of pulmonary manifestations and progression of disease
  - Better assessment of pulmonary conditions other than COVID-19 pneumonia
  - Better assessment of superimposed lung conditions
- d. **MORE ACCURATE CVS DIAGNOSIS** – May include:
  - Better assessment of cardiovascular manifestations (shock, cardiac arrest, stroke, peripheral ischemia of the limbs or splanchnic circulation) and progression of disease
  - Better assessment of cardiac complications
- e. **MORE ACCURATE VTE DIAGNOSIS**
  - Better assessment of venous thromboembolic manifestations (PE, DVT) & progression of disease



**f. MORE EFFECTIVE USE OF MECHANICAL VENTILATION – May include:**

- Better assessment of need for MV (non-invasive/invasive)
- More efficient use of MV (help in choice of ventilator modality/settings)
- Better choice of inadequacy of mechanical ventilation and need for extracorporeal support
- Potentially resulting in fewer complications of MV

**g. MORE APPROPRIATE FLUID MANAGEMENT**

- Better assessment of need of, responsiveness and tolerance to intravenous fluids

**h. MORE EFFECTIVE MONITORING – May include:**

- Better assessment of lung disease course
- Better assessment of lung aeration & recruitment
- Better assessment of hemodynamics
- Better assessment of cardiac disease course
- Better assessment of thromboembolic disease course
- Better assessment of weaning from mechanical ventilation
- Better monitoring of extracorporeal circulation

**i. BETTER INFECTION CONTROL – May include:**

- Reduced in-hospital viral spread
- Lower rate of infection amongst healthcare workers

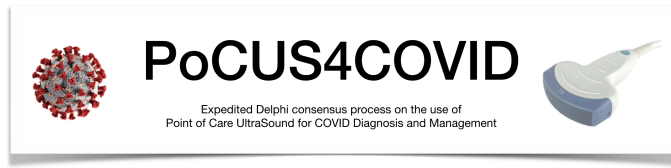

# DELPHI ROUNDS RESULTS - SYNOPSIS

## ROUND 1 - Synopsis

|               | N   | Strength of Consensus |                |                |              | Direction of Agreement |       |          |
|---------------|-----|-----------------------|----------------|----------------|--------------|------------------------|-------|----------|
|               |     | VERY GOOD CONSENSUS   | GOOD CONSENSUS | SOME CONSENSUS | NO CONSENSUS | AGREE                  | AMBIV | DISAGREE |
| Section 1     | 43  | 25,6%                 | 49,2%          | 20,9%          | 7,0%         | 86,0%                  | 6,9%  | 6,9%     |
| Section 2     | 50  | 34,0%                 | 46,0%          | 20,0%          | 0,0%         | 64,0%                  | 10,0% | 6,0%     |
| Section 2     | 32  | 31,3%                 | 59,4%          | 9,4%           | 0,0%         | 93,8%                  | 0,0%  | 6,2%     |
| Section 4     | 4   | 0,0%                  | 100,0%         | 0,0%           | 0,0%         | 50,0%                  | 50,0% | 0,0%     |
| <b>TOTALS</b> | 129 | 30,7%                 | 49,6%          | 17,3%          | 2,4%         | 86,6%                  | 8,7%  | 4,7%     |

## ROUND 2 - Synopsis

|               | N   | Strength of Consensus |                |                |              | Direction of Agreement |       |          |
|---------------|-----|-----------------------|----------------|----------------|--------------|------------------------|-------|----------|
|               |     | VERY GOOD CONSENSUS   | GOOD CONSENSUS | SOME CONSENSUS | NO CONSENSUS | AGREE                  | AMBIV | DISAGREE |
| Section 1     | 43  | 51,2%                 | 25,6%          | 18,6%          | 7,0%         | 83,7%                  | 9,3%  | 7,0%     |
| Section 2     | 50  | 34,0%                 | 54,0%          | 8,0%           | 4,0%         | 84,0%                  | 12,0% | 4,0%     |
| Section 2     | 32  | 56,3%                 | 31,3%          | 12,5%          | 0,0%         | 93,8%                  | 6,3%  | 0,0%     |
| Section 4     | 4   | 0,0%                  | 75,0%          | 25,0%          | 0,0%         | 100,0%                 | 0,0%  | 0,0%     |
| <b>TOTALS</b> | 129 | 44,2%                 | 39,5%          | 13,2%          | 3,9%         | 86,8%                  | 9,3%  | 3,9%     |



## PoCUS4COVID Domains

| <b>DOMAIN</b> | <b>PoCUS APPLICATION</b>                                |
|---------------|---------------------------------------------------------|
| 1             | DIAGNOSIS OF SARS-COV2 INFECTION                        |
| 2             | TRIAGE/DISPOSITION                                      |
| 3             | DIAGNOSIS OF COVID-19 PNEUMONIA                         |
| 4             | CARDIOVASCULAR DIAGNOSIS                                |
| 5             | SCREENING AND DIAGNOSIS OF THROMBOEMBOLIC DISEASE       |
| 6             | PoCUS AND RESPIRATORY SUPPORT STRATEGIES                |
| 7             | MANAGEMENT OF FLUID ADMINISTRATION                      |
| 8             | MONITORING OF COVID-19 PATIENTS                         |
| 9             | INFECTION CONTROL, TECHNIQUES, TECHNOLOGY AND PROTOCOLS |



# RESULTS and SUMMARY RECOMMENDATIONS

## DOMAIN 1 - PoCUS FOR DIAGNOSIS OF SARS-CoV2 INFECTION

| <b>1 - SARS DX</b> | <b>TOTAL<br/>N = 18</b> | <b>%</b> | <b>MILD<br/>N = 7</b> | <b>RESP FAIL<br/>N = 7</b> | <b>XTR-PULM<br/>N = 4</b> |
|--------------------|-------------------------|----------|-----------------------|----------------------------|---------------------------|
| VG                 | 0                       | 0,0%     | 0                     | 0                          | 0                         |
| G                  | 10                      | 55,6%    | 3                     | 5                          | 2                         |
| S                  | 6                       | 33,3%    | 3                     | 1                          | 2                         |
| NC                 | 2                       | 11,1%    | 1                     | 1                          | 0                         |
| <b>AGREE</b>       | 10                      | 55,6%    | 4                     | 4                          | 3                         |
| <b>AMBIV</b>       | 2                       | 11,1%    | 2                     | 2                          | 1                         |
| <b>DISAGREE</b>    | 5                       | 27,8%    | 1                     | 1                          | 0                         |

| <b>GRADEing</b> |           | <b>N = 11</b> | <b>IBID</b> | <b>CONS</b> |
|-----------------|-----------|---------------|-------------|-------------|
| <b>2A</b>       | <b>2B</b> | <b>3</b>      |             | <b>G</b>    |
| 5               | 4         | 2             | 3           |             |
|                 |           |               |             |             |
|                 |           |               |             |             |
|                 |           |               |             |             |
|                 |           |               |             |             |

## DOMAIN 2 - PoCUS AS A TOOL FOR TRIAGE/DISPOSITION

| <b>2 - TRG/DISP</b> | <b>TOTAL<br/>N = 18</b> | <b>%</b> | <b>MILD<br/>N = 7</b> | <b>RESP FAIL<br/>N = 7</b> | <b>XTR-PULM<br/>N = 4</b> |
|---------------------|-------------------------|----------|-----------------------|----------------------------|---------------------------|
| VG                  | 5                       | 27,8%    | 2                     | 1                          | 2                         |
| G                   | 11                      | 61,1%    | 4                     | 5                          | 2                         |
| S                   | 2                       | 11,1%    | 1                     | 1                          | 0                         |
| NC                  | 0                       | 0,0%     | 0                     | 0                          | 0                         |
| <b>AGREE</b>        | 16                      | 88,9%    | 6                     | 6                          | 4                         |
| <b>AMBIV</b>        | 2                       | 11,1%    | 1                     | 1                          | 0                         |
| <b>DISAGREE</b>     | 0                       | 0,0%     | 0                     | 0                          | 0                         |

| <b>GRADEing</b> |           | <b>N = 14</b> | <b>CONS</b> |
|-----------------|-----------|---------------|-------------|
| <b>2A</b>       | <b>2B</b> | <b>3</b>      | <b>G</b>    |
| 1               | 7         | 6             |             |
|                 |           |               |             |
|                 |           |               |             |
|                 |           |               |             |
|                 |           |               |             |

## DOMAIN 3 - PoCUS AS A TOOL FOR TRIAGE/DISPOSITION

| <b>3 - PULM DX</b> | <b>TOTAL<br/>N = 18</b> | <b>%</b> | <b>MILD<br/>N = 7</b> | <b>RESP FAIL<br/>N = 7</b> | <b>XTR-PULM<br/>N = 4</b> |
|--------------------|-------------------------|----------|-----------------------|----------------------------|---------------------------|
| VG                 | 7                       | 38,9%    | 4                     | 2                          | 1                         |
| G                  | 4                       | 22,2%    | 0                     | 3                          | 1                         |
| S                  | 4                       | 22,2%    | 1                     | 1                          | 2                         |
| NC                 | 3                       | 16,7%    | 2                     | 1                          | 0                         |
| <b>AGREE</b>       | 13                      | 72,2%    | 5                     | 5                          | 3                         |
| <b>AMBIV</b>       | 2                       | 11,1%    | 0                     | 1                          | 1                         |
| <b>DISAGREE</b>    | 3                       | 16,7%    | 2                     | 1                          | 0                         |

| <b>GRADEing</b> |           | <b>N = 53</b> | <b>CONS</b> |
|-----------------|-----------|---------------|-------------|
| <b>2A</b>       | <b>2B</b> | <b>3</b>      | <b>G</b>    |
| 5               | 18        | 28            |             |
|                 |           |               |             |
|                 |           |               |             |
|                 |           |               |             |
|                 |           |               |             |



## Recommendations

- 1) We suggest using PoCUS, and especially LUS (presence of heterogeneous B-line clusters, pleural line irregularities, subpleural consolidations), and appropriately integrate the information with clinical assessment to diagnose COVID-19 pneumonia (**LQE II-B, Very Good Agreement**).
- 2) When CT-scan is not accessible or appropriate, we suggest using LUS to aid the diagnosis of COVID-19 pneumonia in suspected cases (**LQE II-B, Good Agreement**).
- 3) In patients with high pre-test probability for COVID-19 and LUS findings suggestive of pneumonia, a negative nasal/oropharyngeal RT-CR may not be used to exclude COVID-19, and LUS findings, further raising suspicion, should prompt repeat testing with better yield (**LQE II-B, Good Agreement**).
- 4) We do *not* recommend using PoCUS and LUS alone to rule out SARS-CoV-2 infection in suspected COVID-19 (LQE II-B, Good Agreement).
- 5) After thorough examination of all lung fields and intercostal spaces a bilateral A-pattern suggests absence of pneumonia in suspected or confirmed SARS-CoV-2 infection (**LQE III, Good Agreement**).
- 6) We suggest multi-organ PoCUS integrated with other clinical information for triaging and risk stratification of suspected COVID-19 at initial presentation (**LQE II-B, Good Agreement**).





## DOMAIN 4 - FoCUS, AND COMPREHENSIVE ECHOCARDIOGRAPHY FOR THE CARDIOVASCULAR DIAGNOSIS IN COVID-19 PATIENTS

| 4 - CVS DX      | TOTAL<br>N = 12 | %             | MILD<br>N = 4 | RESP FAIL<br>N = 4 | XTR-PULM<br>N = 4 |
|-----------------|-----------------|---------------|---------------|--------------------|-------------------|
| VG              | 10              | 83,3%         | 4             | 3                  | 3                 |
| G               | 2               | 16,7%         | 0             | 1                  | 1                 |
| S               | 0               | 0,0%          | 0             | 0                  | 0                 |
| NC              | 0               | 0,0%          | 0             | 0                  | 0                 |
| <b>AGREE</b>    | <b>12</b>       | <b>100,0%</b> | <b>4</b>      | <b>4</b>           | <b>4</b>          |
| <b>AMBIV</b>    | <b>0</b>        | <b>0,0%</b>   | <b>0</b>      | <b>0</b>           | <b>0</b>          |
| <b>DISAGREE</b> | <b>0</b>        | <b>0,0%</b>   | <b>0</b>      | <b>0</b>           | <b>0</b>          |

| GRADEing |    |    | N = 26 | CONS |
|----------|----|----|--------|------|
| 2A       | 2B | 3  |        |      |
| 1        | 10 | 15 | 49     | VG   |
|          |    |    |        |      |
|          |    |    |        |      |
|          |    |    |        |      |
|          |    |    |        |      |
|          |    |    |        |      |
|          |    |    |        |      |
|          |    |    |        |      |

### Recommendations

- 7) We suggest FoCUS and/or echocardiography assessment in moderate-severe COVID-19 as it may change clinical management or provide information that could be lifesaving **(LQE II-B, Very Good Agreement)**.
- 8) We suggest FoCUS and/or echocardiography for assessment of hemodynamic instability in moderate-severe COVID-19 **(LQE II-B, Very Good Agreement)**.
- 9) We recommend FoCUS and echocardiography to diagnose RV and LV systolic dysfunction and cardiac tamponade as etiology of hemodynamic instability in COVID-19 **(LQE II-B, Very Good Agreement)**.
- 10) We suggest using FoCUS/echocardiography to guide hemodynamic management in severe COVID-19 **(LQE II-B, Very Good Agreement)**.



**DOMAIN 5 - PoCUS FOR SCREENING AND DIAGNOSIS OF COVID-19 PATIENTS FOR VENOUS THROMBOEMBOLIC DISEASE (VTE)**

| 5 - VTE DX | TOTAL  |        | MILD  | RESP FAIL | XTR-PULM | GRADEing | N = 32 |    |    | CONS |
|------------|--------|--------|-------|-----------|----------|----------|--------|----|----|------|
|            | N = 12 | %      | N = 4 | N = 4     | N = 4    | 2A       | 2B     | 3  | 12 | VG   |
| VG         | 9      | 75,0%  | 3     | 3         | 3        | 10       | 12     | 10 |    |      |
| G          | 2      | 16,7%  | 1     | 1         | 1        |          |        |    |    |      |
| S          | 1      | 8,3%   | 0     | 0         | 0        |          |        |    |    |      |
| NC         | 0      | 0,0%   | 0     | 0         | 0        |          |        |    |    |      |
| AGREE      | 12     | 100,0% | 4     | 4         | 4        |          |        |    |    |      |
| AMBIV      | 0      | 0,0%   | 0     | 0         | 0        |          |        |    |    |      |
| DISAGREE   | 0      | 0,0%   | 0     | 0         | 0        |          |        |    |    |      |

**Recommendations**

- 11) Because critically ill COVID-19 patients have high risk for VTE, we suggest regular screening for DVT, including central vessels with catheters, independent of oxygenation and coagulation (**LQE II-A, Very Good Agreement**).
- 12) In moderate-severe COVID-19 with hemodynamic worsening or sudden instability we suggest FoCUS for prompt investigation of acute cor-pulmonale (**LQE II-B, Very Good Agreement**).
- 13) In moderate-severe COVID-19 we suggest that echocardiographic indices of worsening RV function and/or increased pulmonary artery pressure may indicate PE (**LQE II-A, Very Good Agreement**).



## DOMAIN 6 - PoCUS AND RESPIRATORY SUPPORT STRATEGIES [INCLUDING MECHANICAL VENTILATION] IN PATIENTS WITH COVID-19 PNEUMONIA

| 6 - RESP SUPP | TOTAL  |       | MILD  | RESP FAIL | XTR-PULM |
|---------------|--------|-------|-------|-----------|----------|
|               | N = 11 | %     | N = 0 | N = 7     | N = 4    |
| VG            | 4      | 36,4% | 0     | 2         | 2        |
| G             | 7      | 63,6% | 0     | 5         | 2        |
| S             | 0      | 0,0%  | 0     | 0         | 0        |
| NC            | 0      | 0,0%  | 0     | 0         | 0        |
| AGREE         | 10     | 90,9% | 0     | 6         | 4        |
| AMBIV         | 1      | 9,1%  | 0     | 1         | 0        |
| DISAGREE      | 0      | 0,0%  | 0     | 0         | 0        |

| GRADEing |    | N = 20 |    | CONS |
|----------|----|--------|----|------|
| 2A       | 2B | 3      | 35 | G    |
| 2        | 11 | 7      | 36 |      |
|          |    |        | 41 |      |
|          |    |        |    |      |
|          |    |        |    |      |
|          |    |        |    |      |
|          |    |        |    |      |
|          |    |        |    |      |

### Recommendations

- 14) We suggest multi-organ PoCUS including LUS over no imaging to guide respiratory support in COVID-19 with respiratory failure (i.e. ventilation, prone positioning, PEEP, recruitment maneuvers) (**LQE II-A, Good Agreement**).
- 15) In addition to standard respiratory monitoring, we suggest LUS over CXR and equally to CT, to guide clinical decisions on respiratory support in COVID-19 with respiratory failure (**LQE II-B, Good Agreement**).
- 16) We suggest multi-organ PoCUS over LUS alone for decisions about respiratory support in COVID-19 with respiratory failure (**LQE II-B, Good Agreement**).



## **DOMAIN 7 - PoCUS FOR MANAGEMENT OF FLUID ADMINISTRATION IN COVID-19 PATIENTS**

| <b>7 - FLD MAN</b> | <b>TOTAL</b>  |          | <b>MILD</b>  | <b>RESP FAIL</b> | <b>XTR-PULM</b> |
|--------------------|---------------|----------|--------------|------------------|-----------------|
|                    | <b>N = 18</b> | <b>%</b> | <b>N = 7</b> | <b>N = 7</b>     | <b>N = 4</b>    |
| <b>VG</b>          | 11            | 61,1%    | 4            | 3                | 4               |
| <b>G</b>           | 5             | 27,8%    | 1            | 4                | 0               |
| <b>S</b>           | 2             | 11,1%    | 2            | 0                | 0               |
| <b>NC</b>          | 0             | 0,0%     | 0            | 0                | 0               |
| <b>AGREE</b>       | 16            | 88,9%    | 6            | 6                | 4               |
| <b>AMBIV</b>       | 2             | 11,1%    | 1            | 1                | 0               |
| <b>DISAGREE</b>    | 0             | 0,0%     | 0            | 0                | 0               |

| <b>GRADEing</b> |           | <b>N = 9</b> |          |           | <b>CONS</b> |
|-----------------|-----------|--------------|----------|-----------|-------------|
| <b>2A</b>       | <b>2B</b> | <b>3</b>     | <b>5</b> | <b>VG</b> |             |
| 0               | 7         | 2            |          |           |             |
|                 |           |              |          |           |             |
|                 |           |              |          |           |             |
|                 |           |              |          |           |             |
|                 |           |              |          |           |             |

### **Recommendations**

- 17) We suggest FoCUS to screen for severe hypovolemia in moderate-severe COVID-19 at presentation, while Doppler-based fluid-responsiveness indices may be used for subsequent management (**LQE II-A, Very Good Agreement**).
- 18) We suggest that LUS alone is not sufficient as a screening tool for pulmonary congestion in moderate-severe COVID-19 (**LQE III, Very Good Agreement**).
- 19) We suggest that LUS alone is not sufficient to judge the appropriateness of fluid administration in moderate-severe COVID-19 (**LQE II-B, Very Good Agreement**).
- 20) In moderate-severe COVID-19 we suggest multi-organ PoCUS to monitor efficacy of fluid removal, by not only LUS findings of reduction of B-pattern areas, but also echocardiographic signs of resolution of volume overload and decreasing LV filling pressures (**LQE II-B, Very Good Agreement**).



## **DOMAIN 8 - PoCUS AS MONITORING TOOL FOR PATIENTS WITH COVID-19**

| <b>8 - MONITOR</b> | <b>TOTAL</b>  |          | <b>MILD</b>  | <b>RESP FAIL</b> | <b>XTR-PULM</b> |
|--------------------|---------------|----------|--------------|------------------|-----------------|
|                    | <b>N = 18</b> | <b>%</b> | <b>N = 7</b> | <b>N = 7</b>     | <b>N = 4</b>    |
| <b>VG</b>          | 11            | 61,1%    | 5            | 3                | 3               |
| <b>G</b>           | 7             | 38,9%    | 2            | 4                | 1               |
| <b>S</b>           | 0             | 0,0%     | 0            | 0                | 0               |
| <b>NC</b>          | 0             | 0,0%     | 0            | 0                | 0               |
| <b>AGREE</b>       | 18            | 100,0%   | 7            | 7                | 4               |
| <b>AMBIV</b>       | 0             | 0,0%     | 0            | 0                | 0               |
| <b>DISAGREE</b>    | 0             | 0,0%     | 0            | 0                | 0               |

| <b>GRADEing</b> |           | <b>N = 49</b> |           | <b>CONS</b> |
|-----------------|-----------|---------------|-----------|-------------|
| <b>2A</b>       | <b>2B</b> | <b>3</b>      | <b>10</b> | <b>VG</b>   |
| 4               | 29        | 16            | 11        |             |
|                 |           |               | 25        |             |
|                 |           |               | 49        |             |
|                 |           |               | 51        |             |
|                 |           |               | 64        |             |
|                 |           |               | 66        |             |
|                 |           |               | 67        |             |

### **Recommendations**

- 21) We suggest serial LUS for respiratory monitoring in moderate-severe COVID-19 (**LQE II-B, Very Good Agreement**).
- 22) We suggest multi-organ PoCUS integrated with other clinical and biochemical variables, in preference to CXR for investigation of respiratory deterioration in moderate-severe COVID-19. (**LQE II-A, Very Good Agreement**).
- 23) We suggest multi-organ PoCUS over LUS alone to detect respiratory deterioration and guide treatment in moderate-severe COVID-19. (**LQE II-B, Very Good Agreement**).
- 24) We suggest a prompt assessment of clinical deterioration with LUS for a timely and accurate bedside diagnosis of pneumothorax in severe COVID-19 (**LQE II-B, Very Good Agreement**).
- 25) We suggest LUS for early identification of ventilator-associated pneumonia in severe COVID-19 (**LQE II-B, Very Good Agreement**).
- 26) We suggest multi-organ PoCUS over CXR and CT to assess readiness for weaning, predict success, and diagnose the cause(s) of weaning failure in COVID-19 (**LQE II-B, Very Good Agreement**).
- 27) We suggest FoCUS, and/or echocardiography for hemodynamic monitoring in moderate-severe COVID-19 (**LQE II-A, Very Good Agreement**).
- 28) We suggest integrating PoCUS-derived information with data from other devices used for hemodynamic monitoring in severe COVID-19 (**LQE II-B, Very Good Agreement**).
- 29) We suggest PoCUS assessment for pre-renal causes of AKI, including hemodynamics and venous congestion in COVID-19 (**LQE II-B, Very Good Agreement**).



## **DOMAIN 9 - PoCUS AND INFECTION CONTROL, PoCUS TECHNIQUE, TECHNOLOGY, PROTOCOLS**

| <b>9 - INF CON</b> | <b>N = 4</b> | <b>%</b>      |  |  |
|--------------------|--------------|---------------|--|--|
| <b>VG</b>          | <b>0</b>     | <b>0,0%</b>   |  |  |
| <b>G</b>           | <b>3</b>     | <b>75,0%</b>  |  |  |
| <b>S</b>           | <b>1</b>     | <b>25,0%</b>  |  |  |
| <b>NC</b>          | <b>0</b>     | <b>0,0%</b>   |  |  |
| <b>AGREE</b>       | <b>4</b>     | <b>100,0%</b> |  |  |
| <b>AMBIV</b>       | <b>0</b>     | <b>0,0%</b>   |  |  |
| <b>DISAGREE</b>    | <b>0</b>     | <b>0,0%</b>   |  |  |

| <b>GRADEing</b> |           |          | <b>N = 23</b> |  | <b>CONS</b> |
|-----------------|-----------|----------|---------------|--|-------------|
| <b>2A</b>       | <b>2B</b> | <b>3</b> |               |  | <b>G</b>    |
| <b>4</b>        | <b>14</b> | <b>5</b> |               |  |             |
|                 |           |          |               |  |             |
|                 |           |          |               |  |             |
|                 |           |          |               |  |             |
|                 |           |          |               |  |             |
|                 |           |          |               |  |             |

### **Recommendations**

- 30) We suggest using laptop/tablet/pocket-sized devices with adequate imaging capabilities that are easier to protect from viral contamination in COVID-19 **(LQE II-B, Good Agreement)**.
- 31) For diagnostic accuracy, quality control and obtaining second opinions, we suggest performance of standardized PoCUS examinations in COVID-19 **(LQE II-B, Good Agreement)**.
- 32) We recommend reporting PoCUS studies and recording, storage and archiving of diagnostic images and cine-clips **(LQE II-B, Good Agreement)**.
- 33) We suggest using tele-ultrasound for remote guidance and consultations in COVID-19. Simple audio-visual communication devices (e.g. smartphones) can facilitate this **(LQE II-B, Good Agreement)**.
- 34) We suggest POCUS over CXR and CT, where appropriate, to reduce environmental spread of infection and risk of infection to healthcare workers in COVID-19 **(LQE II-A, Good Agreement)**.
- 35) We recommend strict adherence to manufacturers' guidance for cleaning and disinfection of equipment used for COVID-19 **(LQE II-A, Good Agreement)**.
- 36) We suggest brief and targeted ultrasound examinations to minimize cross-infection in COVID-19 **(LQE II-B, Good Agreement)**.
